# Supplementary material for: Reverse globalization suppresses phosphorus trade and aggravates food insufficiency and greenhouse gas intensity
Source: Research Square preprint supplement (doi:10.21203/rs.3.rs-5461656/v1), 2025-03-17
Supplement: Supplementary file 1 [file 0c164e414d2feadfedb3a524.xlsx]

## Sheet: Sheet1
Product	Category
Almonds, in shell	Fruits and vegetables
Anise, badian, coriander, cumin, caraway, fennel and juniper berries, raw	other
Apples	Fruits and vegetables
Apricots	Fruits and vegetables
Areca nuts	Fruits and vegetables
Artichokes	Fruits and vegetables
Asparagus	Fruits and vegetables
Avocados	Fruits and vegetables
Bambara beans, dry	other
Bananas	Fruits and vegetables
Barley	Cereals
Beans, dry	Pulses
Blueberries	Fruits and vegetables
Brazil nuts, in shell	Fruits and vegetables
Broad beans and horse beans, dry	Cakes
Broad beans and horse beans, green	other
Buckwheat	Cereals
Cabbages	Fruits and vegetables
Cantaloupes and other melons	Fruits and vegetables
Carrots and turnips	Fruits and vegetables
Cashew nuts, in shell	Fruits and vegetables
Cashewapple	Fruits and vegetables
Cassava, fresh	other
Castor oil seeds	other
Cereals n.e.c.	Cereals
Cherries	Fruits and vegetables
Chestnuts, in shell	Fruits and vegetables
Chick peas, dry	Fruits and vegetables
Chillies and peppers, dry (Capsicum spp., Pimenta spp.), raw	other
Chillies and peppers, green (Capsicum spp. and Pimenta spp.)	other
Cinnamon and cinnamon-tree flowers, raw	other
Cloves (whole stems), raw	other
Cocoa beans	other
Coconuts, in shell	Fruits and vegetables
Coffee, green	other
Coir, raw	other
Cow peas, dry	other
Cranberries	Fruits and vegetables
Cucumbers and gherkins	Fruits and vegetables
Currants	Fruits and vegetables
Dates	Fruits and vegetables
Edible roots and tubers with high starch or inulin content, n.e.c., fresh	other
Eggplants (aubergines)	Fruits and vegetables
Figs	Fruits and vegetables
Flax, raw or retted	other
Gooseberries	Fruits and vegetables
Grapes	Fruits and vegetables
Green corn (maize)	Forage
Groundnuts, excluding shelled	Fruits and vegetables
Hazelnuts, in shell	Fruits and vegetables
Hempseed	other
Kiwi fruit	Fruits and vegetables
Kola nuts	Fruits and vegetables
Lemons and limes	Fruits and vegetables
Lentils, dry	Pulses
Lettuce and chicory	Fruits and vegetables
Linseed	Cakes
Locust beans (carobs)	other
Lupins	other
Maize (corn)	Cereals
Mangoes, guavas and mangosteens	Fruits and vegetables
Melonseed	Fruits and vegetables
Millet	Cereals
Mixed grain	Cereals
Mushrooms and truffles	Fruits and vegetables
Mustard seed	Fruits and vegetables
Nutmeg, mace, cardamoms, raw	Fruits and vegetables
Oats	Cereals
Oil palm fruit	Fruits and vegetables
Olives	Fruits and vegetables
Onions and shallots, dry (excluding dehydrated)	Fruits and vegetables
Onions and shallots, green	Fruits and vegetables
Oranges	Fruits and vegetables
Other beans, green	other
Other berries and fruits of the genus vaccinium n.e.c.	Fruits and vegetables
Other citrus fruit, n.e.c.	Fruits and vegetables
Other fruits, n.e.c.	Fruits and vegetables
Other nuts (excluding wild edible nuts and groundnuts), in shell, n.e.c.	Fruits and vegetables
Other oil seeds, n.e.c.	other
Other pome fruits	Fruits and vegetables
Other stimulant, spice and aromatic crops, n.e.c.	other
Other stone fruits	Fruits and vegetables
Other sugar crops n.e.c.	other
Other tropical fruits, n.e.c.	Fruits and vegetables
Other vegetables, fresh n.e.c.	Fruits and vegetables
Papayas	Fruits and vegetables
Peaches and nectarines	Fruits and vegetables
Pears	Fruits and vegetables
Peas, dry	Pulses
Peas, green	Fruits and vegetables
Pepper (Piper spp.), raw	other
Peppermint, spearmint	Fruits and vegetables
Persimmons	Fruits and vegetables
Pigeon peas, dry	Fruits and vegetables
Pineapples	Fruits and vegetables
Pistachios, in shell	Fruits and vegetables
Plantains and cooking bananas	Fruits and vegetables
Plums and sloes	Fruits and vegetables
Pomelos and grapefruits	Fruits and vegetables
Potatoes	Fruits and vegetables
Pumpkins, squash and gourds	Fruits and vegetables
Quinces	Fruits and vegetables
Quinoa	Fruits and vegetables
Rape or colza seed	Cereals
Raspberries	other
Rice	Cereals
Rye	Cereals
Sorghum	Cereals
Sour cherries	Fruits and vegetables
Soya beans	Pulses
Spinach	Fruits and vegetables
Strawberries	Fruits and vegetables
String beans	Fruits and vegetables
Sugar beet	Fruits and vegetables
Sugar cane	Fruits and vegetables
Sunflower seed	Cereals
Sweet potatoes	Fruits and vegetables
Tangerines, mandarins, clementines	Fruits and vegetables
Taro	Fruits and vegetables
Tea leaves	other
Tomatoes	Fruits and vegetables
Triticale	Cereals
Unmanufactured tobacco	other
Vanilla, raw	other
Walnuts, in shell	Fruits and vegetables
Watermelons	Fruits and vegetables
Wheat	Cereals
Yams	Fruits and vegetables
Other pulses n.e.c.	other
Okra	other
Other fibre crops, raw, n.e.c.	other
Natural rubber in primary forms	other
Pyrethrum, dried flowers	other
Ramie, raw or retted	other
Poppy seed	other
