# Supplementary material for: Reverse globalization suppresses phosphorus trade and aggravates food insufficiency and greenhouse gas intensity
Source: Research Square preprint supplement (doi:10.21203/rs.3.rs-5461656/v1), 2025-03-17
Supplement: Supplementary file 2 [file 32fbddc15e415f7847ec3820.xlsx]

## Sheet: Sheet1
Country	Region
Antigua and Barbuda	Latin America
Albania	Central Europe
Armenia	Eastern Europe and Central Asia
Afghanistan	West Asia
Andorra	West Europe
Aruba	Latin America
Angola	SSA
Argentina	Latin America
Algeria	North Africa
Australia	Oceania
Austria	West Europe
Azerbaijan	Eastern Europe and Central Asia
Bahamas	Latin America
Bahrain	West Asia
Bangladesh	South Asia
Barbados	Latin America
Belarus	Eastern Europe and Central Asia
Belgium	West Europe
Belize	Latin America
Benin	SSA
Bermuda	Latin America
Bhutan	South Asia
Bolivia (Plurinational State of)	Latin America
Bosnia Herzegovina	Central Europe
Botswana	SSA
Brazil	Latin America
Brunei Darussalam	East Asia
Bulgaria	Central Europe
Burkina Faso	SSA
Burundi	SSA
Cabo Verde	SSA
Cambodia	East Asia
Cameroon	SSA
Canada	North America
Cayman Isds	Latin America
Central African Rep.	SSA
Chad	SSA
Chile	Latin America
China	East Asia
Christmas Isds	Oceania
Colombia	Latin America
Comoros	SSA
Congo	SSA
Cook Isds	Oceania
Costa Rica	Latin America
Croatia	Central Europe
Cuba	Latin America
Curaçao	SSA
Cyprus	West Europe
Czechia	Central Europe
Coate d'Ivoire	SSA
Dem. People's Rep. of Korea	East Asia
Dem. Rep. of the Congo	SSA
Denmark	West Europe
Djibouti	SSA
Dominica	Latin America
Dominican Rep.	Latin America
Ecuador	Latin America
Egypt	North Africa
El Salvador	Latin America
Equatorial Guinea	SSA
Eritrea	SSA
Estonia	Eastern Europe and Central Asia
Eswatini	SSA
Ethiopia	SSA
Faeroe Isds	West Europe
Fiji	Oceania
Finland	West Europe
France	West Europe
French Polynesia	Oceania
FS Micronesia	SSA
Gabon	SSA
Gambia	SSA
Georgia	Eastern Europe and Central Asia
Germany	West Europe
Ghana	SSA
Gibraltar	West Europe
Greece	West Europe
Grenada	Latin America
Guatemala	Latin America
Guinea	SSA
Guinea-Bissau	SSA
Guyana	Latin America
Haiti	Latin America
Honduras	Latin America
Hungary	Central Europe
Iceland	West Europe
India	South Asia
Indonesia	East Asia
Iran	West Asia
Iraq	East Asia
Ireland	West Europe
Israel	West Asia
Italy	West Europe
Jamaica	Latin America
Japan	East Asia
Jordan	West Asia
Kazakhstan	Eastern Europe and Central Asia
Kenya	SSA
Kiribati	Oceania
Kuwait	West Asia
Kyrgyzstan	Eastern Europe and Central Asia
Lao People's Dem. Rep.	East Asia
Latvia	Eastern Europe and Central Asia
Lebanon	West Asia
Lesotho	SSA
Liberia	SSA
Libya	North Africa
Lithuania	Eastern Europe and Central Asia
Luxembourg	West Europe
Madagascar	SSA
Malawi	SSA
Malaysia	East Asia
Maldives	East Asia
Mali	SSA
Malta	West Europe
Marshall Isds	Oceania
Mauritania	SSA
Mauritius	SSA
Mexico	Latin America
Mongolia	East Asia
Montenegro	Central Europe
Morocco	North Africa
Mozambique	SSA
Myanmar	East Asia
Namibia	SSA
Nauru	Oceania
Nepal	South Asia
Netherlands	West Europe
New Caledonia	Oceania
New Zealand	Oceania
Nicaragua	Latin America
Niger	SSA
Nigeria	SSA
Niue	Oceania
North Macedonia	Central Europe
Norway	West Europe
Oman	West Asia
Pakistan	South Asia
Panama	Latin America
Papua New Guinea	Oceania
Paraguay	Latin America
Peru	Latin America
Philippines	East Asia
Poland	Central Europe
Portugal	West Europe
Qatar	West Asia
Rep. of Korea	East Asia
Rep. of Moldova	Eastern Europe and Central Asia
Romania	Central Europe
Russian Federation	Eastern Europe and Central Asia
Rwanda	SSA
Saint Kitts and Nevis	Latin America
Saint Lucia	Latin America
Saint Vincent and the Grenadines	Latin America
Samoa	Oceania
Sao Tome and Principe	SSA
Saudi Arabia	West Asia
Senegal	SSA
Serbia	Central Europe
Seychelles	SSA
Sierra Leone	SSA
Singapore	East Asia
Sint Maarten	Latin America
Slovakia	Central Europe
Slovenia	Central Europe
Solomon Isds	Oceania
Somalia	SSA
South Africa	SSA
South Sudan	SSA
Spain	West Europe
Sri Lanka	South Asia
State of Palestine	West Asia
Sudan	SSA
Suriname	Latin America
Sweden	West Europe
Switzerland	West Europe
Syria	West Asia
Tajikistan	Eastern Europe and Central Asia
Thailand	East Asia
Timor-Leste	East Asia
Togo	SSA
Tokelau	Oceania
Tonga	Oceania
Trinidad and Tobago	Latin America
Tunisia	North Africa
Turkmenistan	East Asia
Tuvalu	Oceania
The Republic of Türkiye	West Asia
Uganda	SSA
Ukraine	Eastern Europe and Central Asia
United Arab Emirates	West Asia
United Kingdom	West Europe
United Rep. of Tanzania	SSA
Uruguay	Latin America
USA	North America
Uzbekistan	Eastern Europe and Central Asia
Vanuatu	Oceania
Venezuela	Latin America
Viet Nam	East Asia
Yemen	West Asia
Zambia	SSA
Zimbabwe	SSA

## Sheet: Sheet2
Afghanistan
Albania
Algeria
Angola
Antigua and Barbuda
Argentina
Armenia
Australia
Austria
Azerbaijan
Bahamas
Bahrain
Bangladesh
Barbados
Belarus
Belgium
Belize
Benin
Bermuda
Bhutan
Bolivia (Plurinational State of)
Bosnia Herzegovina
Botswana
Brazil
Brunei Darussalam
Bulgaria
Burkina Faso
Burundi
Cabo Verde
Cambodia
Cameroon
Canada
Central African Rep.
Chad
Chile
China
China, Hong Kong SAR
China, Macao SAR
China, Taiwan Province of
Christmas Isds
Colombia
Comoros
Congo
Cook Isds
Costa Rica
Croatia
Cuba
Cyprus
Czechia
C魌e d'Ivoire
Dem. People's Rep. of Korea
Dem. Rep. of the Congo
Denmark
Djibouti
Dominica
Dominican Rep.
Ecuador
Egypt
El Salvador
Equatorial Guinea
Eritrea
Estonia
Eswatini
Ethiopia
Faeroe Isds
Fiji
Finland
France
French Polynesia
FS Micronesia
Gabon
Gambia
Georgia
Germany
Ghana
Gibraltar
Greece
Grenada
Guatemala
Guinea
Guinea-Bissau
Guyana
Haiti
Honduras
Hungary
Iceland
India
Indonesia
Iran
Iraq
Ireland
Israel
Italy
Jamaica
Japan
Jordan
Kazakhstan
Kenya
Kiribati
Kuwait
Kyrgyzstan
Lao People's Dem. Rep.
Latvia
Lebanon
Lesotho
Liberia
Libya
Lithuania
Luxembourg
Madagascar
Malawi
Malaysia
Maldives
Mali
Malta
Marshall Isds
Mauritania
Mauritius
Mexico
Mongolia
Montenegro
Morocco
Mozambique
Myanmar
Namibia
Nauru
Nepal
Netherlands
New Caledonia
New Zealand
Nicaragua
Niger
Nigeria
Niue
North Macedonia
Norway
Oman
Other Asia, nes
Pakistan
Panama
Papua New Guinea
Paraguay
PartnerDesc
Peru
Philippines
Poland
Portugal
Qatar
Rep. of Korea
Rep. of Moldova
Romania
Russian Federation
Rwanda
Saint Kitts and Nevis
Saint Lucia
Saint Vincent and the Grenadines
Samoa
Sao Tome and Principe
Saudi Arabia
Senegal
Serbia
Seychelles
Sierra Leone
Singapore
Slovakia
Slovenia
Solomon Isds
Somalia
South Africa
South Sudan
Spain
Sri Lanka
State of Palestine
Sudan
Suriname
Sweden
Switzerland
Syria
Tajikistan
Thailand
Timor-Leste
Togo
Tokelau
Tonga
Trinidad and Tobago
Tunisia
Turkmenistan
Tuvalu
T黵kiye
Uganda
Ukraine
United Arab Emirates
United Kingdom
United Rep. of Tanzania
Uruguay
USA
Uzbekistan
Vanuatu
Venezuela
Viet Nam
Yemen
Zambia
Zimbabwe
