# Supplementary material for: Reverse globalization suppresses phosphorus trade and aggravates food insufficiency and greenhouse gas intensity
Source: Research Square preprint supplement (doi:10.21203/rs.3.rs-5461656/v1), 2025-03-17
Supplement: Supplementary file 4 [file aacbf36ddfdc91212eedfe96.xlsx]

## Sheet: Sheet1
Product	P content (g P/kg product)	Category	Transport mode
Abaca, manila hemp, raw	0.89	other	Ambient transport
Almonds, in shell	3.85	Fruits and vegetables	Temperature-controlled transport
Almonds, shelled	4.54	Fruits and vegetables	Temperature-controlled transport
Animal oils and fats n.e.c.	0	Animal products	Temperature-controlled transport
Animal or vegetable fats and oils and their fractions, chemically modified, except those hydrogenated, inter-esterified, re-esterified or elaidinized; inedible mixtures or preparations of animal or vegetable fats or oils	0	Animal products	Temperature-controlled transport
Anise, badian, coriander, cumin, caraway, fennel and juniper berries, raw	0.51	other	Ambient transport
Apple juice	0.21	Fruits and vegetables	Temperature-controlled transport
Apple juice, concentrated	0.45	Fruits and vegetables	Temperature-controlled transport
Apples	0.11	Fruits and vegetables	Temperature-controlled transport
Apricots	0.21	Fruits and vegetables	Temperature-controlled transport
Apricots, dried	1.14	Fruits and vegetables	Temperature-controlled transport
Areca nuts	0.0131	Fruits and vegetables	Temperature-controlled transport
Artichokes	1.3	Fruits and vegetables	Temperature-controlled transport
Asparagus	0.45	Fruits and vegetables	Temperature-controlled transport
Asses	2.16	Animal products	Temperature-controlled transport
Avocados	0.43	Fruits and vegetables	Temperature-controlled transport
Bagasse	0.9	other	Ambient transport
Bambara beans, dry	4.19	other	Ambient transport
Bananas	0.23	Fruits and vegetables	Temperature-controlled transport
Barley	3.42	Cereals	Ambient transport
Barley flour and grits	1.75	Cereals	Ambient transport
Barley, pearled	2.05	Cereals	Ambient transport
Beans, dry	4.19	Pulses	Ambient transport
beef and veal preparations nes	0	Animal products	Temperature-controlled transport
Beer of barley, malted	0.32	other	Ambient transport
Beeswax	0	Animal products	Temperature-controlled transport
Beet pulp	0.45	other	Ambient transport
Beets for fodder	0.9	Forage	Ambient transport
Blueberries	0.13	Fruits and vegetables	Temperature-controlled transport
Bran of barley	11.43	Cereals	Ambient transport
Bran of cereals n.e.c.	11.43	Cereals	Ambient transport
Bran of maize	11.43	Cereals	Ambient transport
Bran of millet	11.43	Cereals	Ambient transport
Bran of mixed grain	11.43	Cereals	Ambient transport
Bran of oats	11.43	Cereals	Ambient transport
Bran of pulses	11.43	Cereals	Ambient transport
Bran of rice	11.43	Cereals	Ambient transport
Bran of rye	11.43	Cereals	Ambient transport
Bran of sorghum	11.43	Cereals	Ambient transport
Bran of wheat	11.43	Cereals	Ambient transport
Brazil nuts, in shell	6.925	Fruits and vegetables	Temperature-controlled transport
Brazil nuts, shelled	6.74	Fruits and vegetables	Temperature-controlled transport
Bread	0.87	Cereals	Ambient transport
Breakfast cereals	0.59	Cereals	Ambient transport
Brewing or distilling dregs and waste	0.17	other	Ambient transport
Broad beans and horse beans, dry	4.26	Cakes	Ambient transport
Broad beans and horse beans, green	4.21	other	Ambient transport
Buckwheat	2.94	Cereals	Ambient transport
Buffalo	0.42	Animal products	Temperature-controlled transport
Bulgur	3.41	Cereals	Ambient transport
Butter of cow milk	0.211084	Animal products	Temperature-controlled transport
Butter of goat milk	0.207861	Animal products	Temperature-controlled transport
Buttermilk, curdled and acidified milk	0.869079	Animal products	Temperature-controlled transport
Buttermilk, dry	0.899939	Animal products	Temperature-controlled transport
Cabbages	0.36	Fruits and vegetables	Temperature-controlled transport
Cake of linseed	6.62	Cakes	Ambient transport
Cake of soya beans	7.1	Cakes	Ambient transport
Cake of copra	8.5	Cakes	Ambient transport
Cake of cottonseed	8.5	Cakes	Ambient transport
Cake of groundnuts	8.5	Fruits and vegetables	Temperature-controlled transport
Cake of maize	9.1	Cakes	Ambient transport
Cake of mustard seed	12.9	Cakes	Ambient transport
Cake of palm kernel	8.5	Cakes	Ambient transport
Cake of rapeseed	12.9	Cakes	Ambient transport
Cake of rice bran	11.43	Cakes	Ambient transport
Cake of sesame seed	8.5	Cakes	Ambient transport
Cake of sunflower seed	11.3	Cakes	Ambient transport
Cake, oilseeds nes	0	Cakes	Ambient transport
Camels	1.6	Animal products	Temperature-controlled transport
Canary seed	8.5	other	Ambient transport
Cane sugar, non-centrifugal	0.9	other	Ambient transport
Canned mushrooms	0.69	Fruits and vegetables	Temperature-controlled transport
Cantaloupes and other melons	0.24	Fruits and vegetables	Temperature-controlled transport
Carrots and turnips	0.35	Fruits and vegetables	Temperature-controlled transport
Cashew nuts, in shell	3.73	Fruits and vegetables	Temperature-controlled transport
Cashew nuts, shelled	3.73	Fruits and vegetables	Temperature-controlled transport
Cashewapple	0.11	Fruits and vegetables	Temperature-controlled transport
Cassava, dry	0.38	other	Ambient transport
Cassava, fresh	0.27	other	Ambient transport
Castor oil seeds	6.42	other	Ambient transport
Cattle	2.4	Animal products	Temperature-controlled transport
Cattle fat, unrendered	0	Animal products	Temperature-controlled transport
Cattle, butcher fat	0	Animal products	Temperature-controlled transport
Cauliflowers and broccoli	0.52	Fruits and vegetables	Temperature-controlled transport
Cereal preparations	0.59	Cereals	Ambient transport
Cereal straw, husks, unprepared, ground, pressed, or in the form of pellets	1	Cereals	Ambient transport
Cereals n.e.c.	3.75854	Cereals	Ambient transport
Cheese from milk of goats, fresh or processed	6.26996	Animal products	Temperature-controlled transport
Cheese from milk of sheep, fresh or processed	5.44218	Animal products	Temperature-controlled transport
Cheese from skimmed cow milk	4.99984	Animal products	Temperature-controlled transport
Cheese from whole cow milk	4.98504	Animal products	Temperature-controlled transport
Cherries	0.23	Fruits and vegetables	Temperature-controlled transport
Chestnuts, in shell	0.67	Fruits and vegetables	Temperature-controlled transport
Chick peas, dry	3.32	Fruits and vegetables	Temperature-controlled transport
Chickens	1.65	Animal products	Temperature-controlled transport
Chicory roots	0.23	other	Ambient transport
Chillies and peppers, dry (Capsicum spp., Pimenta spp.), raw	0.32	other	Ambient transport
Chillies and peppers, green (Capsicum spp. and Pimenta spp.)	0.19	other	Ambient transport
Chocolate products nes	0.21	other	Ambient transport
Cider and other fermented beverages	0.21	other	Ambient transport
Cigarettes	1.09	other	Ambient transport
Cigars and cheroots	1.09	other	Ambient transport
Cinnamon and cinnamon-tree flowers, raw	0.61	other	Ambient transport
Citrus juice, concentrated n.e.c.	0.9	Fruits and vegetables	Temperature-controlled transport
Cloves (whole stems), raw	0.18	other	Ambient transport
Cocoa beans	6.56	other	Ambient transport
Cocoa butter, fat and oil	0	other	Ambient transport
Cocoa husks and shells	1.92	other	Ambient transport
Cocoa paste not defatted	6.56	other	Ambient transport
Cocoa powder and cake	0	other	Ambient transport
Coconut oil	0	Fruits and vegetables	Temperature-controlled transport
Coconuts, desiccated	0.94	Fruits and vegetables	Temperature-controlled transport
Coconuts, in shell	0.875	Fruits and vegetables	Temperature-controlled transport
Coffee extracts	1.92	other	Ambient transport
Coffee husks and skins	1.92	other	Ambient transport
Coffee substitutes	1.92	other	Ambient transport
Coffee, decaffeinated or roasted	1.92	other	Ambient transport
Coffee, green	1.6	other	Ambient transport
Coir, raw	0.875	other	Ambient transport
Communion wafers, empty cachets of a kind suitable for pharmaceutical use, sealing wafers, rice paper and similar products.	0.21	other	Ambient transport
Compound feed n.e.c.	5.5	Pulses	Ambient transport
Copra	0.89	other	Ambient transport
Cotton lint, ginned	6.4	other	Ambient transport
Cotton linters	0.14	other	Ambient transport
Cotton seed	5.24	Cakes	Ambient transport
Cotton waste	6.4	other	Ambient transport
Cotton, carded or combed	0.14	other	Ambient transport
Cottonseed oil	0	other	Ambient transport
Cow peas, dry	3.39	other	Ambient transport
Cranberries	0.1	Fruits and vegetables	Temperature-controlled transport
Cream, fresh	0.851471	Animal products	Temperature-controlled transport
Cucumbers and gherkins	0.17	Fruits and vegetables	Temperature-controlled transport
Currants	1.1	Fruits and vegetables	Temperature-controlled transport
Dairy products n.e.c.	0.21	other	Ambient transport
DAP	201.02	Mineral P	Ambient transport
Dates	0.57	Fruits and vegetables	Temperature-controlled transport
Degras	0	Animal products	Temperature-controlled transport
Dog or cat food, put up for retail sale	1.9	other	Ambient transport
Dried mushrooms	12.5	Fruits and vegetables	Temperature-controlled transport
Ducks	1.14	Animal products	Temperature-controlled transport
Edible offal of buffalo, fresh, chilled or frozen	0.431158	Animal products	Temperature-controlled transport
Edible offal of cattle, fresh, chilled or frozen	1.60917	Animal products	Temperature-controlled transport
Edible offal of goat, fresh, chilled or frozen	1.59623	Animal products	Temperature-controlled transport
Edible offal of pigs, fresh, chilled or frozen	1.60652	Animal products	Temperature-controlled transport
Edible offal of sheep, fresh, chilled or frozen	1.60296	Animal products	Temperature-controlled transport
Edible offals and liver of chickens and guinea fowl, fresh, chilled or frozen	2.4002	Animal products	Temperature-controlled transport
Edible offals and liver of ducks, fresh, chilled or frozen	0	Animal products	Temperature-controlled transport
Edible offals and liver of geese, fresh, chilled or frozen	0	Animal products	Temperature-controlled transport
Edible offals and liver of turkey, fresh, chilled or frozen	2.33236	Animal products	Temperature-controlled transport
Edible offals of horses and other equines, fresh, chilled or frozen	1.6007	Animal products	Temperature-controlled transport
Edible roots and tubers with high starch or inulin content, n.e.c., dry	0.38	other	Ambient transport
Edible roots and tubers with high starch or inulin content, n.e.c., fresh	0.38	other	Ambient transport
Eggplants (aubergines)	0.25	Fruits and vegetables	Temperature-controlled transport
Eggs from other birds in shell, fresh, n.e.c.	2.14338	Animal products	Temperature-controlled transport
Eggs, dried	7.5737	Animal products	Temperature-controlled transport
Eggs, liquid	2.04082	Animal products	Temperature-controlled transport
Essential oils n.e.c.	0	Animal products	Temperature-controlled transport
Extracts, essences and concentrates of tea or mate, and preparations with a basis thereof or with a basis of tea or maté	3.14	other	Ambient transport
Fat of pigs	0	Animal products	Temperature-controlled transport
Fat of poultry	0	Animal products	Temperature-controlled transport
Fat preparations n.e.c.	0	Animal products	Temperature-controlled transport
Fatty liver preparations	0	Animal products	Temperature-controlled transport
Feed supplements	7.1	Cakes	Ambient transport
Feed, compound, cattle	5.5	Forage	Ambient transport
Feed, compound, pigs	5.5	Forage	Ambient transport
Feed, compound, poultry	5.5	Forage	Ambient transport
Feed, food waste preparations	5.5	Forage	Ambient transport
Feed, other concentrates nes	5.5	Forage	Ambient transport
Figs	0.14	Fruits and vegetables	Temperature-controlled transport
Figs, dried	1.08	Fruits and vegetables	Temperature-controlled transport
Fine animal hair, n.e.c.	0	Animal products	Temperature-controlled transport
Flax, processed but not spun	0.89	other	Ambient transport
Flax, raw or retted	0.89	other	Ambient transport
Flax, tow and waste	0.89	other	Ambient transport
Flour of buckwheat	1.75	Cereals	Ambient transport
Flour of cassava	0.5	Cereals	Ambient transport
Flour of cereals n.e.c.	1.75	Cereals	Ambient transport
Flour of fruits	0.5	Fruits and vegetables	Temperature-controlled transport
Flour of maize	1.75	Cereals	Ambient transport
Flour of millet	1.75	Cereals	Ambient transport
Flour of mixed grain	1.75	Cereals	Ambient transport
Flour of mustard seed	1.75	Cereals	Ambient transport
Flour of pulses	5.5	Pulses	Ambient transport
Flour of rice	1.75	Cereals	Ambient transport
Flour of roots and tubers n.e.c.	0.5	Cereals	Ambient transport
Flour of rye	1.75	Cereals	Ambient transport
Flour of sorghum	1.75	Cereals	Ambient transport
Flour, meal, powder, flakes, granules and pellets of potatoes	0.5	Fruits and vegetables	Temperature-controlled transport
Flours and meals of oil seeds or oleaginous fruits, except those of mustard	0.5	Cereals	Ambient transport
Fonio	3.41	Cereals	Ambient transport
Food preparations n.e.c.	1.68576	Animal products	Temperature-controlled transport
Food preparations of flour, meal or malt extract	0.17	Cereals	Ambient transport
Food wastes	0.87	other	Ambient transport
Forage and silage, alfalfa	3.4	Forage	Ambient transport
Forage and silage, maize	3.1	Forage	Ambient transport
Fruit prepared n.e.c.	0.07	Fruits and vegetables	Temperature-controlled transport
Fruit, nuts, peel, sugar preserved	4.09	Fruits and vegetables	Temperature-controlled transport
Geese	2.33236	Animal products	Temperature-controlled transport
Germ of maize	2.13	Cereals	Ambient transport
Germ of wheat	2.13	Cereals	Ambient transport
Ghee from cow milk	7.07483	Animal products	Temperature-controlled transport
Ginger, raw	0.34	other	Ambient transport
Glucose and dextrose	0	other	Ambient transport
Gluten feed and meal	1.3	Forage	Ambient transport
Gooseberries	0.44	Fruits and vegetables	Temperature-controlled transport
Grape juice	0.14	Fruits and vegetables	Temperature-controlled transport
Grapefruit juice	0.14	Fruits and vegetables	Temperature-controlled transport
Grapefruit juice, concentrated	0.9	Fruits and vegetables	Temperature-controlled transport
Grapes	0.2535	Fruits and vegetables	Temperature-controlled transport
Grapes, marc	0.2535	Fruits and vegetables	Temperature-controlled transport
Green corn (maize)	2.8	Forage	Ambient transport
Green garlic	0.96	Fruits and vegetables	Temperature-controlled transport
Groundnut oil	0	Fruits and vegetables	Temperature-controlled transport
Groundnuts, excluding shelled	0.875	Fruits and vegetables	Temperature-controlled transport
Groundnuts, shelled	3.41	Fruits and vegetables	Temperature-controlled transport
Hair, carded/combed	0.163265	Animal products	Temperature-controlled transport
Hair, coarse nes	0	Animal products	Temperature-controlled transport
Hair, goat, fine	0.099552	Animal products	Temperature-controlled transport
Hair, horse	0.100037	Animal products	Temperature-controlled transport
Hay for forage, from other crops n.e.c.	3.1	Forage	Ambient transport
Hay, non-leguminous	3.1	Forage	Ambient transport
Hazelnuts, in shell	3	Fruits and vegetables	Temperature-controlled transport
Hazelnuts, shelled	3.33	Fruits and vegetables	Temperature-controlled transport
Hempseed	6.42	other	Ambient transport
Hen eggs in shell, fresh	2.13895	Animal products	Temperature-controlled transport
Hides nes, dry salted	0.418367	Animal products	Temperature-controlled transport
Hides, cattle nes	0.419995	Animal products	Temperature-controlled transport
Hides, cattle, dry salted	0.419676	Animal products	Temperature-controlled transport
Hides, horse, wet salted	0.420058	Animal products	Temperature-controlled transport
Hides, wet salted nes	0.420019	Animal products	Temperature-controlled transport
Hides, wet-salted of cattle	0.408163	Animal products	Temperature-controlled transport
Homogenized cooked fruit, prepared	0.11	Fruits and vegetables	Temperature-controlled transport
Homogenized vegetable preparations	0.11	Fruits and vegetables	Temperature-controlled transport
Hop cones	0.32	other	Ambient transport
Horses	2.16	Animal products	Temperature-controlled transport
Husked rice	1.14	other	Ambient transport
hydrogenated oils and fats	1.14	other	Ambient transport
Ice cream and other edible ice	0.109894	Animal products	Temperature-controlled transport
Infant food	1.09	other	Ambient transport
Isoglucose	0.45	other	Ambient transport
Jojoba oil	0	other	Ambient transport
Juice of citrus fruit n.e.c.	0.16	Fruits and vegetables	Temperature-controlled transport
Juice of fruits n.e.c.	0.16	Fruits and vegetables	Temperature-controlled transport
Juice of lemon	1.6	Fruits and vegetables	Temperature-controlled transport
Juice of mango	1.6	Fruits and vegetables	Temperature-controlled transport
Juice of pineapples, concentrated	0.9	Fruits and vegetables	Temperature-controlled transport
Juice of tangerine	0.16	Fruits and vegetables	Temperature-controlled transport
Jute, raw or retted	0.83	other	Ambient transport
Karite nuts (sheanuts)	0	Fruits and vegetables	Temperature-controlled transport
Kenaf, and other textile bast fibres, raw or retted	9.5	other	Ambient transport
Kiwi fruit	0.31	Fruits and vegetables	Temperature-controlled transport
Kola nuts	0.0130857	Fruits and vegetables	Temperature-controlled transport
Lactose	1.89	other	Ambient transport
Lard stearine and lard oil	0	other	Ambient transport
Leather used & waste	0.21	other	Ambient transport
Leeks and other alliaceous vegetables	0.48	Fruits and vegetables	Temperature-controlled transport
Lemon juice, concentrated	0.16	Fruits and vegetables	Temperature-controlled transport
Lemons and limes	0.16	Fruits and vegetables	Temperature-controlled transport
Lentils, dry	4.11	Pulses	Ambient transport
Lettuce and chicory	0.23	Fruits and vegetables	Temperature-controlled transport
Linseed	6.62	Cakes	Ambient transport
Liquid margarine	0	other	Ambient transport
Liver preparations	2.40339	Animal products	Temperature-controlled transport
Locust beans (carobs)	0.655	other	Ambient transport
Lucerne (alfalfa) meal and pellets	3.4	Forage	Ambient transport
Lupins	0.655	other	Ambient transport
Maize (corn)	2.8	Cereals	Ambient transport
Malt extract	0.17	other	Ambient transport
Malt, whether or not roasted	0.17	Cereals	Ambient transport
Mango pulp	0.13	Fruits and vegetables	Temperature-controlled transport
Mangoes, guavas and mangosteens	0.14	Fruits and vegetables	Temperature-controlled transport
MAP	227.24	Mineral P	Ambient transport
Margarine and shortening	8.665	other	Ambient transport
Maté leaves	3.14	other	Ambient transport
Meat meal	1.9	Animal products	Temperature-controlled transport
Meat of buffalo, fresh or chilled	1.9	Animal products	Temperature-controlled transport
Meat of camels, fresh or chilled	1.9	Animal products	Temperature-controlled transport
Meat of cattle boneless, fresh or chilled	1.9	Animal products	Temperature-controlled transport
Meat of cattle with the bone, fresh or chilled	1.9	Animal products	Temperature-controlled transport
Meat of chickens, fresh or chilled	1.65	Animal products	Temperature-controlled transport
Meat of ducks, fresh or chilled	1.96	Animal products	Temperature-controlled transport
Meat of geese, fresh or chilled	1.84	Animal products	Temperature-controlled transport
Meat of goat, fresh or chilled	1.9	Animal products	Temperature-controlled transport
Meat of pig boneless, fresh or chilled	1.92	Animal products	Temperature-controlled transport
Meat of pig with the bone, fresh or chilled	1.92	Animal products	Temperature-controlled transport
Meat of pigeons and other birds n.e.c., fresh, chilled or frozen	1.92	Animal products	Temperature-controlled transport
Meat of rabbits and hares, fresh or chilled	2.16	Animal products	Temperature-controlled transport
Meat of sheep, fresh or chilled	1.62	Animal products	Temperature-controlled transport
Meat of turkeys, fresh or chilled	1.75	Animal products	Temperature-controlled transport
Meat prepared n.e.c.	1.5	Animal products	Temperature-controlled transport
Melonseed	0.24	Fruits and vegetables	Temperature-controlled transport
Millet	2.5	Cereals	Ambient transport
Mixed grain	1.75	Cereals	Ambient transport
Mixes and doughs for the preparation of bakers' wares	3.41	Cereals	Ambient transport
Molasses	0	other	Ambient transport
Mules and hinnies	0.45	Animal products	Temperature-controlled transport
Mushrooms and truffles	1.09	Fruits and vegetables	Temperature-controlled transport
Must of grape	0.2535	Fruits and vegetables	Temperature-controlled transport
Mustard seed	5.096	Fruits and vegetables	Temperature-controlled transport
Mustard seed oil, crude	8.5	other	Ambient transport
Natural honey	0.05	other	Ambient transport
Natural rubber in other forms	0.2	other	Ambient transport
Natural rubber in primary forms	0.2	other	Ambient transport
Nutmeg, mace, cardamoms, raw	2.1	Fruits and vegetables	Temperature-controlled transport
Oats	4.315	Cereals	Ambient transport
Oats, rolled	4.15	Cereals	Ambient transport
Offals n.e.c. (excluding mammals), fresh, chilled or frozen	1.59236	Animal products	Temperature-controlled transport
Oil of castor beans	0	other	Ambient transport
Oil of citronella	0	other	Ambient transport
Oil of linseed	0	other	Ambient transport
Oil of maize	0	other	Ambient transport
Oil of olive residues	0	Fruits and vegetables	Temperature-controlled transport
Oil of palm kernel	0	other	Ambient transport
Oil of rice bran	0	other	Ambient transport
Oil of sesame seed	0	other	Ambient transport
Oil of tung nuts	0	other	Ambient transport
Okra	0.62	other	Ambient transport
Olive oil	0	Fruits and vegetables	Temperature-controlled transport
Olive residues	0.17	Fruits and vegetables	Temperature-controlled transport
Olives	0.17	Fruits and vegetables	Temperature-controlled transport
Olives preserved	0.17	Fruits and vegetables	Temperature-controlled transport
Onions and shallots, dry (excluding dehydrated)	0.47	Fruits and vegetables	Temperature-controlled transport
Onions and shallots, green	0.47	Fruits and vegetables	Temperature-controlled transport
Orange juice	0.16	Fruits and vegetables	Temperature-controlled transport
Orange juice, concentrated	0.9	Fruits and vegetables	Temperature-controlled transport
Oranges	0.2	Fruits and vegetables	Temperature-controlled transport
Other beans, green	2.69056	other	Ambient transport
Other berries and fruits of the genus vaccinium n.e.c.	0.13	Fruits and vegetables	Temperature-controlled transport
Other camelids	2.4	Animal products	Temperature-controlled transport
Other citrus fruit, n.e.c.	0.2	Fruits and vegetables	Temperature-controlled transport
Other fibre crops, raw, n.e.c.	9.5	other	Ambient transport
Other forage products, n.e.c.	3.1	Forage	Ambient transport
Other fructose and syrup	0	other	Ambient transport
Other fruit n.e.c., dried	1.14	Fruits and vegetables	Temperature-controlled transport
Other fruits, n.e.c.	0.52	Fruits and vegetables	Temperature-controlled transport
Other manufactured tobacco and manufactured tobacco substitutes; homogenized" or "reconstituted" tobacco; tobacco extracts and essences"	1.09	other	Ambient transport
Other non-alcoholic caloric beverages	0.16	Fruits and vegetables	Temperature-controlled transport
Other nuts (excluding wild edible nuts and groundnuts), in shell, n.e.c.	4.09	Fruits and vegetables	Temperature-controlled transport
Other oil of vegetable origin, crude n.e.c.	0	other	Ambient transport
Other oil seeds, n.e.c.	0	other	Ambient transport
Other pulses n.e.c.	2.125	other	Ambient transport
Other raw skins of other animals, preserved	0.417234	Animal products	Temperature-controlled transport
Other rodents	2.40816	Animal products	Temperature-controlled transport
Other stimulant, spice and aromatic crops, n.e.c.	0.51	other	Ambient transport
Other stone fruits	4.09	Fruits and vegetables	Temperature-controlled transport
Other sugar crops n.e.c.	0.9	other	Ambient transport
Other tropical fruit, dried	0.38	Fruits and vegetables	Temperature-controlled transport
Other tropical fruits, n.e.c.	0.38	Fruits and vegetables	Temperature-controlled transport
Other vegetable juices	0.16	Fruits and vegetables	Temperature-controlled transport
Other vegetables provisionally preserved	1.842	Fruits and vegetables	Temperature-controlled transport
Other vegetables, fresh n.e.c.	1.842	Fruits and vegetables	Temperature-controlled transport
P acid	235.98	Mineral P	Ambient transport
P rock	131.1	Mineral P	Ambient transport
Palm kernels	2.914	other	Ambient transport
Palm oil	0	other	Ambient transport
Papayas	0.125	Fruits and vegetables	Temperature-controlled transport
Paste of tomatoes	0.31333	Fruits and vegetables	Temperature-controlled transport
Pastry	1.53	Cereals	Ambient transport
Peaches and nectarines	0.27667	Fruits and vegetables	Temperature-controlled transport
Peanut butter	3.93	Fruits and vegetables	Temperature-controlled transport
Pears	0.115	Fruits and vegetables	Temperature-controlled transport
Peas, dry	4.58	Pulses	Ambient transport
Peas, green	0.91	Fruits and vegetables	Temperature-controlled transport
Pepper (Piper spp.), raw	1.59	other	Ambient transport
Peppermint, spearmint	0.73	Fruits and vegetables	Temperature-controlled transport
Persimmons	0.215	Fruits and vegetables	Temperature-controlled transport
Pig fat, rendered	0	Animal products	Temperature-controlled transport
Pig meat preparations	2.04082	Animal products	Temperature-controlled transport
Pig meat, cuts, salted, dried or smoked (bacon and ham)	1.36054	Animal products	Temperature-controlled transport
Pig, butcher fat	0	Animal products	Temperature-controlled transport
Pigeon peas, dry	3.76766	Fruits and vegetables	Temperature-controlled transport
Pineapple juice	0.05	Fruits and vegetables	Temperature-controlled transport
Pineapples	0.09	Fruits and vegetables	Temperature-controlled transport
Pineapples, otherwise prepared or preserved	0.09	Fruits and vegetables	Temperature-controlled transport
Pistachios, in shell	4.85	Fruits and vegetables	Temperature-controlled transport
Plantains and cooking bananas	0.23	Fruits and vegetables	Temperature-controlled transport
Plums and sloes	0.17	Fruits and vegetables	Temperature-controlled transport
Plums, dried	0.73	Fruits and vegetables	Temperature-controlled transport
Pomelos and grapefruits	0.13	Fruits and vegetables	Temperature-controlled transport
Poppy seed	8.595	other	Ambient transport
Pot barley	3.42	Cereals	Ambient transport
Potato offals	0.5	Fruits and vegetables	Temperature-controlled transport
Potatoes	0.5	Fruits and vegetables	Temperature-controlled transport
Potatoes, frozen	0.5	Fruits and vegetables	Temperature-controlled transport
Poultry fat, rendered	0	Animal products	Temperature-controlled transport
Prepared groundnuts	4.09	Fruits and vegetables	Temperature-controlled transport
Prepared nuts	4.09	Fruits and vegetables	Temperature-controlled transport
Processed cheese	0.45	other	Ambient transport
Pulp, waste of fruit for feed	1.1	Fruits and vegetables	Temperature-controlled transport
Pumpkins, squash and gourds	0.44	Fruits and vegetables	Temperature-controlled transport
Pyrethrum extract	0	other	Ambient transport
Pyrethrum, dried flowers	1.3	other	Ambient transport
Quinces	0.17	Fruits and vegetables	Temperature-controlled transport
Quinoa	4.57	Fruits and vegetables	Temperature-controlled transport
Rabbits and hares	1.81406	Animal products	Temperature-controlled transport
Raisins	0.19	Fruits and vegetables	Temperature-controlled transport
Rape or colza seed	5.46	Cereals	Ambient transport
Rapeseed or canola oil, crude	0	other	Ambient transport
Raspberries	0.3775	other	Ambient transport
Raw cane or beet sugar (centrifugal only)	0.89	other	Ambient transport
Raw hides and skins of sheep or lambs, with wool	0.435374	Animal products	Temperature-controlled transport
Raw milk of cattle	4.9999	Animal products	Temperature-controlled transport
Refined cane or beet sugar, in solid form, containing added flavouring or colouring matter; maple sugar and maple syrup	0	other	Ambient transport
Refined sugar	0.003	other	Ambient transport
Residues of fatty substances	0	Animal products	Temperature-controlled transport
Rice	2.5	Cereals	Ambient transport
Rice, broken	2.5	Cereals	Ambient transport
Rice, milled	1.14	Cereals	Ambient transport
Rice, milled (husked)	1.14	Cereals	Ambient transport
Rice, paddy (rice milled equivalent)	1.14	Cereals	Ambient transport
Rice-fermented beverages	0.32	Cereals	Ambient transport
Rye	6.42	Cereals	Ambient transport
Safflower seed	5.59	other	Ambient transport
Safflower-seed oil, crude	0	other	Ambient transport
Sesame seed	6.795	Cakes	Ambient transport
Sheep	1.62	Animal products	Temperature-controlled transport
Sheep fat, unrendered	0	Animal products	Temperature-controlled transport
Shorn wool, greasy, including fleece-washed shorn wool	0.21	other	Ambient transport
Silk waste	0.21	other	Ambient transport
Silk-worm cocoons suitable for reeling	1.14	other	Ambient transport
Sisal, raw	9.5	other	Ambient transport
Skim milk and whey powder	1.00251	Animal products	Temperature-controlled transport
Skim milk of cows	0.951098	Animal products	Temperature-controlled transport
Skim milk, condensed	0.969966	Animal products	Temperature-controlled transport
Skim milk, evaporated	0.97	Animal products	Temperature-controlled transport
Skins, calve, dry salted	0.419991	Animal products	Temperature-controlled transport
Skins, dry-salted of sheep	0.420053	Animal products	Temperature-controlled transport
Skins, furs	0.41996	Animal products	Temperature-controlled transport
Skins, karakul	0.408163	Animal products	Temperature-controlled transport
Skins, pig, wet salted	0.420001	Animal products	Temperature-controlled transport
Skins, rabbit	0.420337	Animal products	Temperature-controlled transport
Skins, sheep nes	0.419501	Animal products	Temperature-controlled transport
Skins, wet-salted of calves	0.428571	Animal products	Temperature-controlled transport
Skins, wet-salted of sheep	0.421769	Animal products	Temperature-controlled transport
Sorghum	3.10667	Cereals	Ambient transport
Sour cherries	0.18	Fruits and vegetables	Temperature-controlled transport
Soya bean oil	0	other	Ambient transport
Soya beans	4.77985	Pulses	Ambient transport
Soya paste	0.97	Pulses	Ambient transport
Soya sauce	5.5	other	Ambient transport
Spinach	0.506667	Fruits and vegetables	Temperature-controlled transport
Starch of cassava	0.12	other	Ambient transport
Strawberries	0.26	Fruits and vegetables	Temperature-controlled transport
Sugar and syrups n.e.c.	0	other	Ambient transport
Sugar beet	0.9	Fruits and vegetables	Temperature-controlled transport
Sugar cane	0.9	Fruits and vegetables	Temperature-controlled transport
Sugar confectionery	0	other	Ambient transport
Sunflower seed	7.5	Cereals	Ambient transport
Sunflower-seed oil, crude	0	other	Ambient transport
Sweet corn, frozen	0.83	Fruits and vegetables	Temperature-controlled transport
Sweet corn, prepared or preserved	0.83	Fruits and vegetables	Temperature-controlled transport
Sweet potatoes	0.41	Fruits and vegetables	Temperature-controlled transport
Swine / pigs	1.92	Animal products	Temperature-controlled transport
Tallow	1.14	Fruits and vegetables	Temperature-controlled transport
Tangerines, mandarins, clementines	0.2	Fruits and vegetables	Temperature-controlled transport
Tapioca of cassava	0.38	other	Ambient transport
Tapioca of potatoes	0.5	Fruits and vegetables	Temperature-controlled transport
Taro	0.645	Fruits and vegetables	Temperature-controlled transport
Tea leaves	3.14	other	Ambient transport
Tomato juice	0.16	Fruits and vegetables	Temperature-controlled transport
Tomatoes	0.22	Fruits and vegetables	Temperature-controlled transport
Tomatoes, peeled (o/t vinegar)	0.11	Fruits and vegetables	Temperature-controlled transport
Triticale	6.42	Cereals	Ambient transport
True hemp, raw or retted	9.5	other	Ambient transport
TSP	201.02	Mineral P	Ambient transport
Tung nuts	4.6	Fruits and vegetables	Temperature-controlled transport
Turkeys	0.0131	other	Ambient transport
Uncooked pasta, not stuffed or otherwise prepared	1.14	other	Ambient transport
Undenatured ethyl alcohol of an alcoholic strength by volume of less than 80% vol; spirits, liqueurs and other spirituous beverages	1.14	other	Ambient transport
Unmanufactured tobacco	1.35	other	Ambient transport
Vanilla, raw	0.021	other	Ambient transport
Vegetable products for feed n.e.c.	0.52	Fruits and vegetables	Temperature-controlled transport
Vegetable products, fresh or dry n.e.c.	0.52	Fruits and vegetables	Temperature-controlled transport
Vegetable waxes (other than triglycerides), whether or not refined or coloured	0.52	Fruits and vegetables	Temperature-controlled transport
Vegetables and roots fodder	0.52	Fruits and vegetables	Temperature-controlled transport
Vegetables frozen	0.52	Fruits and vegetables	Temperature-controlled transport
Vegetables preserved (frozen)	0.52	Fruits and vegetables	Temperature-controlled transport
Vegetables preserved nes (o/t vinegar)	0.52	Fruits and vegetables	Temperature-controlled transport
Vegetables, dehydrated	1.9	Fruits and vegetables	Temperature-controlled transport
Vegetables, pulses and potatoes, preserved by vinegar or acetic acid	0.3	Fruits and vegetables	Temperature-controlled transport
Vermouth and other wine of fresh grapes flavoured with plats or aromatic substances	0.28	Fruits and vegetables	Temperature-controlled transport
Walnuts, in shell	3.58	Fruits and vegetables	Temperature-controlled transport
Walnuts, shelled	4.09	Fruits and vegetables	Temperature-controlled transport
Watermelons	0.15	Fruits and vegetables	Temperature-controlled transport
Wheat	4.35	Cereals	Ambient transport
Wheat and meslin flour	1.75	Cereals	Ambient transport
Whey cheese	0.21	other	Ambient transport
Whey, condensed	0.21	other	Ambient transport
Whey, dry	0.45	other	Ambient transport
Whey, fresh	0.45	other	Ambient transport
Whole milk powder	4.99543	Animal products	Temperature-controlled transport
Whole milk, condensed	7.14286	Animal products	Temperature-controlled transport
Whole milk, evaporated	7.13871	Animal products	Temperature-controlled transport
Wine	0.28	other	Ambient transport
Wool grease and lanolin	0.233236	Animal products	Temperature-controlled transport
Wool, degreased or carbonized, not carded or combed	0.148423	Animal products	Temperature-controlled transport
Wool, hair waste	0.163265	Animal products	Temperature-controlled transport
Wool, shoddy	0.14886	Animal products	Temperature-controlled transport
Yams	0.55	Fruits and vegetables	Temperature-controlled transport
Yautia	0.51	Fruits and vegetables	Temperature-controlled transport
Yoghurt	0.920893	Animal products	Temperature-controlled transport
Yoghurt, with additives	0.916854	Animal products	Temperature-controlled transport
